# Supplementary material
Source: publisher figshare collection journal article supplement (https://wiley.figshare.com/articles/dataset/_/3555711)
Supplement: Supplementary file 2 [file 1 › appendix-B.htm]

Ecological Archives E094-080-A2


*Ecological Archives* E094-080-A2

Jurgis Sapijanskas, Catherine Potvin, Michel Loreau. 2013. Beyond shading: Litter production by neighbors contributes to overyielding in tropical trees. *Ecology* 94:941–952. http://dx.doi.org/10.1890/12-0337.1

Appendix B. Allometric relationships of total leaf-dry-mass used as a proxy for litter production.

> View / download PDF.


---

[Back to E094-080]
